# Supplementary material
Source: Springer Nature journal article supplement (https://www.springermedizin.de/resource/supplementary/12990_2009_222_MOESM8_ESM.pdf/9612822)

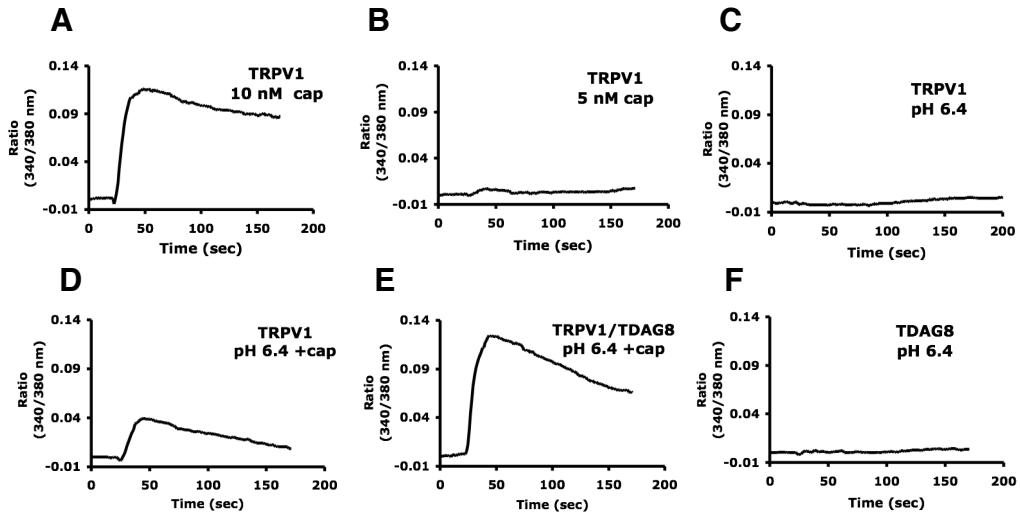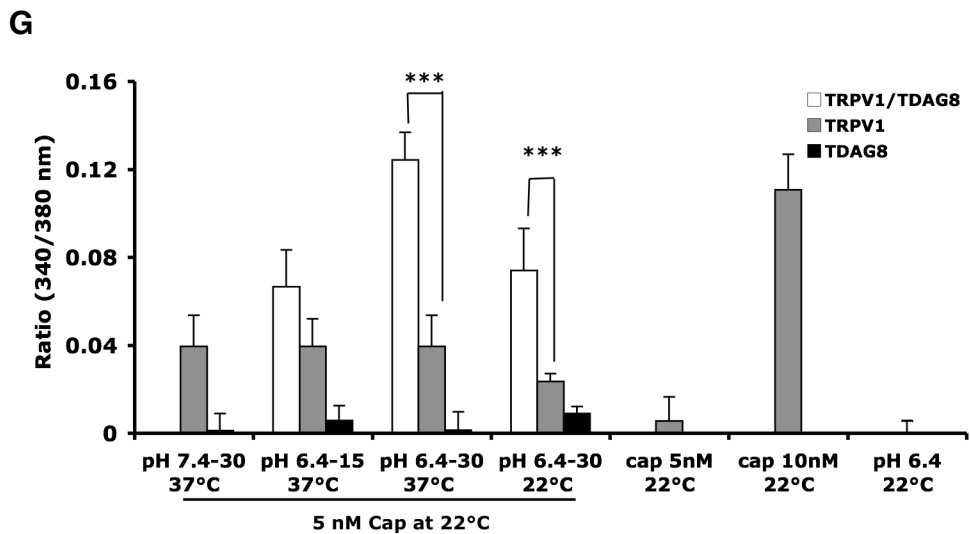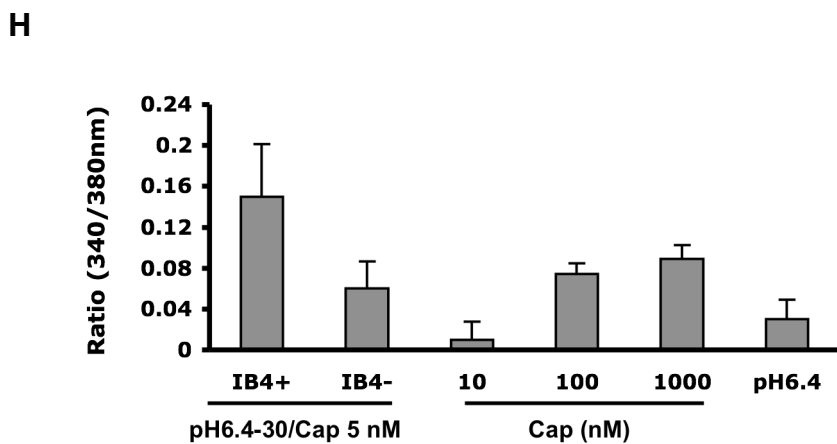

Supplement: MOESM8 [file 9612822]
